# Supplementary material for: Biogeochemical Dichotomy and Intra-Order Variability in Miliolid and Rotaliid Foraminifera
Source: Copernicus journal article supplement (doi:10.5194/egusphere-2026-38), 2026-02-03
Supplement: Supplementary file 1 [file S1.xlsx]

## Sheet: S1
	Blanks, unit in ppb
	Li	Mg	43Ca	44Ca	V	Mn	Fe	Cu	Zn	As	Sr	Cd	La	Nd	Sm	Pb	U
		3.79814	29.6832	30.6798	0.00303315	0.0475224	1.23578	0.102703	1.23749	0.00644035	0.0845		0.000204642			0.0372051	0.00163223
	0.0259479	6.34367	77.9476	82.6362	0.00464663	0.0654298	1.35859	2.59888	2.41852		0.178137	0.0008617	0.00140338			0.0653584	0.000889306
	0.0225336	13.8371	126.007	164.748	0.00784695	0.0544872	1.67711	0.114583	1.74532		1.08124		0.0009394			0.0453062	0.00271737
	0.0588668	5.91408	110.353	129.821	0.00476522	0.0363826	1.27737	0.0972592	1.69109	0.0063142	0.179517	0.000726342	0.000955905			0.0412929	0.00072448
		7.35373	51.3566	74.2969	0.00608788	0.0492816	1.53575	0.102489	1.44845	0.026373	0.133774		0.000251888	0.00105453		0.0637483	0.00024221
	0.0641498	8.03719	67.336	86.2395	0.00435064	0.0611613	8.53045	0.320546	2.55375	0.0262347	0.166337	0.000849851	0.000549457			0.0539188	0.000501262
		6.84963	69.0205	55.3857	0.00548761	0.0324487	1.58356	0.191936	4.60121		0.117529		0.000558942			0.0445895	0.000969916
	0.0310601	5.82786	67.2693	69.047	0.00410673	0.0601604	1.29257	0.236225	1.27474		0.120226					0.0490544	0.000627765
	0.0269731	5.49138	143.668	42.6052	0.00109065	0.0826852	1.27131	0.0960908	1.57314		0.069178		0.00022649	0.00118984		0.0377035	0.000246939
		8.02267	153.223	100.461	0.00334774	0.0735298	0.731735	0.136101	2.26193		0.168291	0.0007876	0.00098944		0.00121949	0.0437239	0.00061548
		6.06977	114.308	63.2001	0.00296082	0.0390827	0.906769	0.261603	1.51079	0.0145643	0.116521	0.000956276	0.00101478			0.0500847	0.000743293
	0.0324165	7.91306	155.854	59.0408	0.00321651	0.0668121	1.31006	0.22524	1.72644	0.00801028	0.176238		0.00105147	0.00110736		0.044963	0.000540646
	0.0288571	5.16358	105.6	49.8052		0.0540333	1.68584	0.101716	1.59489		0.0994368			0.00296723		0.0399238	0.000384557
		5.85555	64.6835	42.9154	0.00847068	0.0438818	1.32488	0.115902	1.60358		0.107172	0.000827035				0.0458329	0.000426707
	0.0947526	5.95481	89.7956	76.9304	0.00443373	0.0613509	1.05569	0.111376	1.37548	0.0154581	0.190717	0.00158547	0.000247878			0.0534071	0.000633766
Average	0.0428397	6.82881	95.0737	75.1875	0.00456035	0.0552167	1.78516	0.320843	1.90779	0.0147707	0.199255	0.000942039	0.000699472	0.00157974	0.00121949	0.0477408	0.000793062
SD	0.0244905	2.26086	38.509	35.2427	0.00195737	0.0141024	1.88457	0.634271	0.843832	0.00869062	0.246978	0.000292335	0.000409134	0.000926665	#DIV/0!	0.00845954	0.000631934
