# Supplementary material for: Biogeochemical Dichotomy and Intra-Order Variability in Miliolid and Rotaliid Foraminifera
Source: Copernicus journal article supplement (doi:10.5194/egusphere-2026-38), 2026-02-03
Supplement: Supplementary file 2 [file S2.xlsx]

## Sheet: S2
Elemet/Ca units in umol/mol
Species	Li	Mg	V	Mn	Fe	Cu	Zn	As	Sr	Cd	La	Nd	Sm	Pb	U
A. lobifera	20.895	46441.9	0.181616	30.5471	29.5623	15.7131	29.9661	0.302692	1865.97	0.0455259	0.122476	0.104406	0.0203635	1.56045	0.0154122	`
A. lobifera	17.3842	40460.2	FALSE	11.9491	FALSE	FALSE	FALSE	FALSE	1803.96	0.0126611	0.0994365	0.102227	0.0150389	0.598383	0.0104776
A. lobifera	20.2998	39980.2	FALSE	14.3523	FALSE	FALSE	FALSE	FALSE	1775.7	0.0232829	0.0977836	0.0976182	0.0126971	0.669931	0.0113066
A. lobifera	21.6505	39437.3	FALSE	10.8008	FALSE	FALSE	FALSE	FALSE	1749.37	0.0141151	0.108339	0.0906542	0.0127467	0.585443	0.0096093
A. lobifera	18.5528	41472.9	FALSE	12.3198	FALSE	8.00532	FALSE	FALSE	1827.67	0.0286754	0.0941196	0.0969588	0.011434	0.732442	0.0116417
A. lobifera	27.0817	42674.3	FALSE	15.0932	21.1549	FALSE	FALSE	FALSE	1746.05	0.0169739	0.13409	0.104743	0.0154124	0.767527	0.0114968
A. lobifera	20.1068	39629.4	FALSE	14.9378	FALSE	FALSE	FALSE	FALSE	1720.83	0.0174809	0.110385	0.109261	0.0232986	0.652041	0.0108309
A. lobifera	20.471	45808.4	FALSE	19.1585	25.6997	2.25972	FALSE	FALSE	1742.79	0.0234806	0.153892	0.150277	0.0191986	0.956431	0.0164116
A. lobifera	20.1469	38614.9	FALSE	12.1059	FALSE	FALSE	FALSE	FALSE	1724.03	0.0293842	0.118356	0.122454	0.0220391	0.807265	0.0116617
A. lobifera	21.4174	38412.3	FALSE	15.3309	17.7249	FALSE	FALSE	0.170812	1696.19	0.0272831	0.0848647	0.097456	0.0155445	0.687358	0.010346
A. lobifera	23.8412	42795.4	FALSE	12.0078	FALSE	FALSE	FALSE	FALSE	1820.93	0.0368841	0.129051	0.134326	0.0313633	0.833451	0.0135499
A. lobifera	19.4216	42768.3	FALSE	10.4904	FALSE	FALSE	FALSE	FALSE	1811.93	0.0242416	0.105213	0.117034	0.0214521	0.718272	0.0137597
A. lobifera	28.1385	45509.8	FALSE	11.8521	FALSE	FALSE	FALSE	FALSE	1824.92	0.0197976	0.0990028	0.118778	0.0286339	0.815051	0.0118789
A. lobifera	27.4667	43520.7	FALSE	19.0268	FALSE	FALSE	FALSE	FALSE	1636.08	0.0655486	0.128001	0.127315	0.0352866	1.38795	0.0131007
A. lobifera	20.5902	44089.6	FALSE	21.6878	FALSE	FALSE	FALSE	FALSE	1696.81	0.0181677	0.191801	0.21861	0.0578598	1.39185	0.0136658
A. lobifera	19.2317	42587.7	0.182503	23.5374	FALSE	FALSE	FALSE	FALSE	1707.34	0.0328403	0.136758	0.139844	0.0292494	1.07429	0.0156632
A. lobifera	FALSE	42543.9	FALSE	19.1585	FALSE	FALSE	FALSE	FALSE	1650.82	0.0526604	0.127891	0.149645	0.0238008	1.28378	0.0154935
A. lobifera	20.8367	39257.4	FALSE	19.9758	FALSE	36.228	FALSE	FALSE	1699.1	0.0321254	0.135089	0.146933	0.0284323	1.51378	0.0140677
A. lobifera	32.4745	40865.2	FALSE	16.5506	FALSE	19.6808	FALSE	FALSE	1622.88	0.0337813	0.0991087	0.0832586	FALSE	1.0097	0.0117807
A. lobifera	16.55	44744.7	FALSE	19.2662	FALSE	FALSE	FALSE	FALSE	1642.02	0.0356949	0.122393	0.114363	0.0237535	1.08509	0.0136991
A. lobifera	22.4697	44073.1	0.259471	20.9858	FALSE	FALSE	FALSE	0.674049	1653.48	0.0547154	0.135035	0.112835	FALSE	1.78451	0.0139358
A. lobifera	16.7016	41519.5	0.43674	23.8093	40.1287	4.24201	FALSE	0.579985	1648.07	0.04358	0.15547	0.142412	0.0239379	1.87395	0.0173881
A. lobifera	18.3998	42043.8	0.184068	24.7624	FALSE	FALSE	FALSE	FALSE	1650.11	0.0453634	0.177269	0.190623	0.0477067	1.57127	0.0144639
A. lobifera	12.131	41130.2	0.284106	26.0619	FALSE	7.82814	FALSE	0.412441	1651.32	0.0466169	0.14867	0.114536	0.0208245	2.7147	0.0153626
A. lobifera	19.6112	42266.1	0.306062	35.4561	FALSE	12.5109	FALSE	0.601159	1680.84	0.0545536	0.131859	0.080604	0.0176167	3.94026	0.0145858
A. lobifera	17.1407	37319.4	FALSE	12.4541	41.8123	8.48922	FALSE	FALSE	1624.05	0.0327549	0.158546	0.177502	0.0237221	4.56255	0.0224078
A. lobifera	17.3439	41018.5	0.238783	13.3683	FALSE	13.9552	FALSE	0.656862	1639.5	0.0352577	0.117375	0.101215	0.0169991	4.95571	0.017404
A. lobifera	15.6399	37947.8	FALSE	10.672	FALSE	11.9211	FALSE	0.705976	1606.9	0.0350171	0.123285	0.1294	0.0367069	4.43777	0.0127464
A. lobifera	FALSE	40499.9	FALSE	9.83144	FALSE	23.2507	FALSE	FALSE	1595.58	FALSE	0.128639	0.136087	FALSE	8.79099	0.0115103
A. lobifera	FALSE	38689	FALSE	8.3637	FALSE	17.3765	FALSE	FALSE	1597.79	FALSE	0.152573	0.12749	FALSE	5.7706	0.0132945
A. lobifera	21.8881	40660.9	FALSE	25.9889	FALSE	FALSE	FALSE	FALSE	1634.56	0.0508247	0.107119	0.104093	FALSE	1.74435	0.0140114
A. lobifera	FALSE	38773	FALSE	13.6407	FALSE	12.7491	FALSE	FALSE	1574.29	0.0462875	0.153174	0.16671	FALSE	5.53137	0.0202946
A. lobifera	FALSE	34812.5	FALSE	11.4934	FALSE	13.5623	FALSE	FALSE	1549.61	0.0465784	0.103001	0.0566328	FALSE	6.46432	0.0122396
A. lobifera	FALSE	37804.5	FALSE	12.7042	FALSE	8.82284	FALSE	FALSE	1583.08	0.0568273	0.105289	0.0963843	FALSE	3.48762	0.0126642
A. lobifera	22.6902	37267.8	FALSE	15.1868	FALSE	14.6397	FALSE	FALSE	1556.21	FALSE	0.119488	0.118018	FALSE	5.90178	0.0128894
A. lobifera	FALSE	35458.6	FALSE	13.9543	FALSE	18.6088	FALSE	1.01088	1525.61	FALSE	0.124826	0.10543	FALSE	6.5503	0.0135479
A. lobifera	21.7421	36121.9	FALSE	8.97633	FALSE	17.9429	FALSE	FALSE	1578.12	FALSE	0.132228	0.12474	FALSE	6.13242	0.0113406
A. lobifera	FALSE	36988.8	FALSE	12.5724	FALSE	16.9601	FALSE	0.887951	1514.77	FALSE	0.144817	0.130691	FALSE	5.62472	0.0124092
Rosalina	FALSE	72604.8	3.76413	89.445	1744.69	FALSE	FALSE	FALSE	1963.15	FALSE	2.26145	2.03589	0.503913	28.044	FALSE
Rosalina	FALSE	75062.7	3.11587	56.2147	1671.46	FALSE	FALSE	FALSE	2078.32	0.263476	2.5698	3.04221	0.553186	25.1871	FALSE
Rosalina	FALSE	87605	5.58618	56.9753	2420.3	FALSE	FALSE	FALSE	2229.09	FALSE	2.15646	2.73143	0.301455	26.7268	FALSE
Rosalina	FALSE	76474.7	5.26981	FALSE	2107.96	FALSE	FALSE	FALSE	1999.08	FALSE	2.63002	3.05464	FALSE	30.613	FALSE
Pararotalia	27.2711	147663	FALSE	20.4851	FALSE	10.6427	FALSE	2.00955	2181.08	0.0635381	1.22186	1.06172	0.308556	5.9642	0.0355569
Pararotalia	43.8406	147083	0.280751	18.9282	66.2617	9.26101	FALSE	1.70667	2158.68	0.0484212	1.28587	1.13356	0.358017	4.70331	0.0411835
Pararotalia	36.8124	135688	0.555117	80.8632	349.706	15.9951	FALSE	1.77802	2052.56	0.081523	1.35058	1.28474	0.425184	5.91157	0.0371432
Pararotalia	31.1769	144119	0.310488	34.2389	117.16	8.65087	FALSE	0.866131	2146.16	0.0849929	1.72879	1.63786	0.384261	8.67463	0.0380014
Pararotalia	43.2964	146501	FALSE	11.8373	67.1974	17.4482	FALSE	1.07456	2204.79	0.0679717	1.02346	1.01156	0.252351	9.04275	0.0473241
Pararotalia	24.5104	144864	0.249673	221.534	154.132	21.5509	FALSE	1.25455	2125.08	0.0673007	0.969576	0.975573	0.342192	10.4491	0.0328891
Pararotalia	35.6872	143238	0.3773	17.5337	109.84	24.1504	FALSE	0.664975	2159.53	0.076787	1.23118	1.14428	0.372603	11.7011	0.0365494
Pararotalia	37.1347	144826	0.477716	13.2123	155.587	25.5568	FALSE	1.20456	2136.77	0.0571156	1.05835	1.0218	0.289237	11.3356	0.0310839
Pararotalia	32.7283	148067	0.309199	15.0337	104	33.3649	FALSE	1.21647	2161.45	0.0425957	1.06248	1.05957	0.249961	10.6226	0.0373841
Pararotalia	42.4286	149157	0.397209	14.4816	92.2752	34.371	FALSE	1.38749	2150.07	0.0390703	1.06396	1.01906	0.306941	10.9521	0.0330263
Peneroplis	FALSE	141338	FALSE	186.951	184.38	30.385	FALSE	FALSE	1844.31	0.262224	9.1061	10.1603	2.12074	23.5256	0.174929
Peneroplis	FALSE	147390	FALSE	153.828	FALSE	FALSE	FALSE	FALSE	1753.77	0.205135	7.62779	8.7397	1.78734	16.263	0.126774
Peneroplis	FALSE	150578	FALSE	134.994	FALSE	21.6036	FALSE	FALSE	1710.92	0.118332	7.22713	7.44762	1.60004	16.5381	0.144378
Peneroplis	FALSE	142959	FALSE	279.905	FALSE	FALSE	FALSE	2.28499	2004.43	0.183587	10.043	10.9328	2.23284	31.2458	0.18599
Peneroplis	FALSE	148386	FALSE	179.042	FALSE	FALSE	FALSE	FALSE	1753.34	0.112655	7.65723	8.56921	1.88445	25.6048	0.150978
Peneroplis	FALSE	147152	FALSE	148.648	FALSE	18.1419	FALSE	1.38406	1721.64	0.103972	7.57638	8.4888	1.66399	23.9134	0.134401
Peneroplis	FALSE	148463	FALSE	181.152	FALSE	24.8386	292.535	1.4421	1826.64	0.164247	8.83564	10.1062	1.88473	33.4054	0.135853
Peneroplis	FALSE	149892	FALSE	187.505	FALSE	25.398	517.852	1.44836	1831.03	0.105197	8.45447	9.23321	2.00971	40.4569	0.147059
Peneroplis	FALSE	148288	FALSE	157.959	FALSE	21.0467	343.417	FALSE	1796.34	0.265435	7.58718	8.30396	1.44612	35.9401	0.134885
Peneroplis	FALSE	148095	FALSE	212.844	FALSE	28.0631	252.469	1.53553	1823.21	0.164524	8.5557	9.20881	1.80776	38.1853	0.141131
Peneroplis	FALSE	151030	FALSE	145.254	165.476	43.6497	195.555	1.24151	1751.98	0.166664	6.86801	7.21213	1.34553	16.5796	0.146806
Peneroplis	FALSE	146192	FALSE	113.537	FALSE	13.0033	FALSE	FALSE	1709.68	0.18346	5.60664	5.92424	1.09939	12.5114	0.128378
Peneroplis	#DIV/0!	149509	FALSE	128.036	FALSE	FALSE	FALSE	FALSE	1713.43	0.133067	6.5042	6.97907	1.22178	10.1262	0.158146
Peneroplis	FALSE	151660	FALSE	109.03	FALSE	FALSE	FALSE	FALSE	1687.35	0.130249	5.19502	5.0979	0.915002	9.15482	0.130821
Peneroplis	#DIV/0!	153110	FALSE	104.68	FALSE	FALSE	FALSE	FALSE	1798.26	0.136453	5.34111	5.72471	0.992069	12.0948	0.149701
Peneroplis	FALSE	152392	FALSE	131.584	FALSE	14.0312	FALSE	1.26131	1717.65	0.15296	5.791	6.18543	1.2444	16.5726	0.127612
Peneroplis	FALSE	144774	FALSE	139.882	FALSE	24.1013	FALSE	2.10232	1722.66	0.172481	6.07785	6.46898	1.12906	19.3608	0.139024
Peneroplis	#DIV/0!	148295	FALSE	136.365	109.386	19.5929	141.801	1.59329	1738.54	0.185936	6.68522	6.93536	1.18712	21.9482	0.13632
Peneroplis	FALSE	148791	FALSE	161.21	115.81	20.5859	FALSE	1.36856	1732.7	0.145852	6.55856	7.00232	1.12653	25.0948	0.123985
Peneroplis	FALSE	150056	FALSE	98.2888	FALSE	FALSE	256.821	FALSE	1710.03	0.159438	5.29143	5.64647	1.07254	18.2793	0.138367
Peneroplis	FALSE	149805	FALSE	138.345	FALSE	17.5225	212.287	FALSE	1837.07	0.191397	6.26566	5.33686	0.935267	19.3446	0.160802
Peneroplis	FALSE	146023	FALSE	111.798	FALSE	FALSE	FALSE	FALSE	1758.25	0.210204	5.84896	5.24478	0.938487	13.9101	0.150982
Peneroplis	FALSE	146433	FALSE	101.019	FALSE	29.9947	FALSE	FALSE	1826.55	0.129238	4.91866	4.27515	0.973726	11.2401	0.156644
Peneroplis	FALSE	152221	FALSE	115.598	FALSE	23.0912	FALSE	FALSE	1798.67	0.188671	5.06145	4.54781	0.923039	13.3272	0.164253
Peneroplis	FALSE	147576	FALSE	103.359	FALSE	FALSE	FALSE	FALSE	1783	0.184486	5.72209	5.20349	1.09227	16.7699	0.156078
Peneroplis	FALSE	145541	FALSE	106.921	FALSE	FALSE	FALSE	FALSE	1736.73	0.177633	5.40705	4.57588	0.929755	16.3406	0.134296
Peneroplis	FALSE	144055	FALSE	137.652	127.174	17.0029	182.126	1.45822	1762.27	0.215672	6.02261	5.33227	0.950527	33.4403	0.147317
Peneroplis	FALSE	144791	FALSE	124.882	FALSE	14.6942	164.354	1.36846	1818.42	0.247461	5.61067	5.16228	1.05535	27.5012	0.146642
Peneroplis	FALSE	144632	FALSE	127.003	112.123	13.9269	135.199	1.05492	1778.29	0.132094	5.70388	5.04067	0.982334	25.5165	0.133692
Peneroplis	FALSE	143038	FALSE	131.415	FALSE	13.9464	247.25	FALSE	1777.73	0.213161	5.96121	5.40281	1.09592	29.4843	0.131437
S. orbiculus	6.91694	146944	0.427349	292.958	154.768	10.7153	92.8651	1.86367	1980.39	0.16769	6.39443	6.56922	1.03297	14.9411	0.165302
S. orbiculus	FALSE	147141	0.379975	283.491	117.835	10.298	95.2549	2.47644	1980.81	0.161408	6.94977	7.31919	1.06594	16.0802	0.173012
S. orbiculus	5.22094	144666	0.329083	288.762	112.981	7.55258	83.6898	2.14612	1994.5	0.144382	6.70978	7.00256	1.12161	15.3678	0.169785
S. orbiculus	4.58421	145491	0.395412	300.404	127.875	11.9593	121.219	1.87702	2001.6	0.165642	7.061	7.64015	1.16797	19.7747	0.170091
S. orbiculus	FALSE	146432	0.248189	316.129	84.439	15.1618	99.047	1.55809	1965.35	0.201822	6.23312	6.43745	0.926673	32.6483	0.162109
S. orbiculus	8.80517	145401	0.246296	311.039	95.9403	24.6569	143.547	2.04127	1962.14	0.199603	6.51458	6.87405	1.0971	59.3884	0.158449
S. orbiculus	6.89256	148916	0.378024	318.784	104.064	27.4459	128.303	1.37528	2001.38	0.183507	6.73341	7.03451	1.08225	40.3256	0.163429
S. orbiculus	FALSE	141166	0.480143	338.248	182.007	37.7217	181.467	1.31461	2211.56	0.221988	6.74117	7.3121	1.11116	84.9548	0.235993
S. orbiculus	FALSE	147801	0.182002	318.525	70.5606	22.0695	145.975	1.4672	1885.48	0.208929	5.34146	5.33755	0.783057	40.1179	0.155093
S. orbiculus	FALSE	147558	0.285514	288.731	97.488	22.7653	165.661	2.2052	1939.7	0.177445	6.971	7.59438	1.13632	52.9517	0.151108
S. orbiculus	FALSE	145900	0.572144	256.924	93.0989	15.0824	77.5698	1.14437	1774.34	0.0957605	5.41854	5.2491	0.883875	14.1083	0.171516
S. orbiculus	FALSE	154748	0.390855	250.397	FALSE	FALSE	FALSE	0.68532	1812.46	0.11504	5.5995	5.38366	0.868452	13.496	0.177216
S. orbiculus	FALSE	141867	FALSE	192.625	FALSE	57.3535	FALSE	FALSE	1754.58	0.0976735	4.849	4.65984	0.694077	12.0782	0.16407
S. orbiculus	FALSE	140277	0.458863	224.292	FALSE	FALSE	FALSE	0.995848	1726.33	0.0839174	5.73718	5.9966	1.04506	15.2014	0.161679
S. orbiculus	FALSE	144278	FALSE	285.007	FALSE	11.1539	FALSE	1.14711	1789	0.147702	5.99853	5.95258	1.08859	20.168	0.170649
S. orbiculus	FALSE	147112	0.263665	264.738	64.5391	175.264	135.175	1.38208	1801.07	0.175758	5.87059	5.80544	1.02814	42.396	0.162421
S. orbiculus	FALSE	150059	0.43449	303.259	79.0055	39.4969	213.207	1.63245	1748.03	0.199005	5.31636	5.00253	0.96816	71.7507	0.160148
S. orbiculus	FALSE	148684	0.42556	265.058	66.2222	32.5294	168.042	1.16957	1749.44	0.183923	5.39595	5.1046	1.04592	58.5853	0.152383
S. orbiculus	FALSE	148797	0.380596	316.449	85.8846	27.1931	171.092	1.12873	1745.88	0.166765	5.20277	5.25734	0.865949	72.1853	0.15385
S. orbiculus	FALSE	149507	0.242228	343.152	53.1847	41.3932	271.949	0.809999	1767.78	0.252046	5.53601	5.5331	0.97984	85.2912	0.161928
S. orbiculus	FALSE	135309	FALSE	184.301	FALSE	FALSE	FALSE	FALSE	1747.93	0.169989	4.99692	4.61738	0.80098	15.7775	0.164641
S. orbiculus	#DIV/0!	146929	FALSE	189.947	FALSE	FALSE	FALSE	FALSE	1798.35	0.145498	5.39333	4.78619	0.861114	18.6989	0.173346
S. orbiculus	FALSE	137193	FALSE	152.015	FALSE	FALSE	FALSE	FALSE	1697.71	0.123843	4.46998	4.11582	0.486958	32.4932	0.158162
S. orbiculus	FALSE	140910	FALSE	205.249	FALSE	FALSE	FALSE	1.87717	1724.81	0.241068	4.95478	4.53426	0.876624	22.6087	0.17178
S. orbiculus	FALSE	143127	FALSE	222.459	FALSE	20.455	FALSE	2.12872	1755.92	0.163494	5.08625	5.27727	0.732847	35.8342	0.163868
S. orbiculus	FALSE	139484	FALSE	204.217	FALSE	FALSE	FALSE	FALSE	1729.27	0.0874464	4.31286	4.238	0.763883	50.4566	0.149333
S. orbiculus	FALSE	139119	FALSE	229.761	FALSE	38.7862	FALSE	FALSE	1815.2	0.18406	5.03883	4.81067	0.906392	70.8683	0.178254
S. orbiculus	FALSE	137066	FALSE	149.953	FALSE	FALSE	FALSE	FALSE	1704.72	0.347702	3.8817	4.03821	0.938409	78.9291	0.154981
S. orbiculus	FALSE	142310	FALSE	235.979	FALSE	60.2886	FALSE	FALSE	1750.24	0.189136	4.40597	3.99472	0.777526	94.9898	0.14256
S. orbiculus	#DIV/0!	141013	FALSE	248.13	FALSE	FALSE	FALSE	FALSE	1798.26	0.32818	4.73581	5.23008	0.603923	141.57	0.134936
S. orbiculus	#DIV/0!	146781	FALSE	188.619	FALSE	FALSE	FALSE	FALSE	1934.85	0.405743	6.06389	5.12415	1.16514	33.8781	0.21502
S. orbiculus	#DIV/0!	136550	FALSE	158.896	FALSE	FALSE	FALSE	FALSE	1741.19	FALSE	5.37931	4.61843	0.731669	27.0558	0.184329
S. orbiculus	#DIV/0!	135597	FALSE	190.516	FALSE	FALSE	FALSE	FALSE	1677.29	FALSE	5.96643	5.07857	0.973222	23.1396	0.189408
S. orbiculus	#DIV/0!	143133	FALSE	201.471	FALSE	FALSE	FALSE	FALSE	1713.41	0.24801	5.11358	4.15633	0.802911	36.3637	0.170148
S. orbiculus	FALSE	145461	FALSE	217.118	FALSE	FALSE	4063.2	FALSE	1826.06	0.27873	4.75914	4.68765	0.683272	44.2188	0.169157
S. orbiculus	#DIV/0!	134818	FALSE	222.267	FALSE	FALSE	FALSE	FALSE	1681.96	0.214084	4.17026	3.70894	0.601684	68.0679	0.160752
S. orbiculus	FALSE	149618	FALSE	229.926	FALSE	FALSE	FALSE	FALSE	1873.84	0.271869	5.01322	4.87053	0.732285	128.116	0.170828
S. orbiculus	#DIV/0!	132849	FALSE	188.88	FALSE	64.8556	FALSE	FALSE	1663.28	0.273015	4.1486	3.74744	0.6107	120.243	0.159346
S. orbiculus	#DIV/0!	143885	FALSE	206.389	FALSE	FALSE	FALSE	FALSE	1732.36	0.32595	4.31805	3.62529	0.720615	129.946	0.140135
S. orbiculus	FALSE	140009	FALSE	183.672	FALSE	60.9026	FALSE	#DIV/0!	1695.78	0.224012	5.06838	4.0948	0.737591	106.835	0.173944
lachlanella	FALSE	116533	1.82522	412.792	295.249	FALSE	389.911	3.77305	1951.69	0.252069	7.40364	5.84742	0.958184	35.8366	0.127251
lachlanella	FALSE	117909	1.07589	436.179	279.623	FALSE	326.228	2.65654	1977.94	0.366268	7.46119	5.94474	0.928912	44.9371	0.144509
lachlanella	FALSE	120361	0.703138	383.519	310.888	18.7048	281.089	FALSE	1941.16	0.238048	7.18736	5.33351	0.784021	44.6355	0.0890994
lachlanella	FALSE	126216	1.09651	391.434	280.371	18.3615	277.025	2.55604	1920.87	0.264861	6.52043	5.22068	0.855136	44.3547	0.13013
lachlanella	FALSE	119209	FALSE	450.285	226.159	29.3477	339.593	2.44416	1915.35	0.303212	6.26643	4.67775	0.857111	65.143	0.107169
lachlanella	FALSE	118731	1.12627	416.467	370.988	27.5668	360.041	3.34327	1874.95	0.250081	7.10869	5.56096	0.979301	69.5288	0.176242
lachlanella	FALSE	124367	2.31673	384.339	248.256	76.9916	448.983	2.28285	1883.63	0.320283	6.24158	4.64034	0.696377	99.0333	0.111618
lachlanella	FALSE	124302	0.907285	463.456	291.609	49.8269	343.48	1.98933	1957.5	0.290735	6.48594	4.67907	0.82918	93.9402	0.1046
lachlanella	#DIV/0!	124269	1.10401	447.017	326.135	71.0974	564.331	FALSE	1871	0.232381	6.28826	4.66207	0.829491	96.6031	0.107231
lachlanella	FALSE	117585	FALSE	502.615	330.581	82.6932	681.392	FALSE	1930.05	0.350872	6.70274	5.34115	0.978635	170.826	0.103781
lachlanella	FALSE	119410	1.15652	396.844	262.657	FALSE	438.308	3.31356	1934.52	0.333054	6.17111	4.99665	0.988783	42.2209	0.121356
lachlanella	FALSE	121484	FALSE	404.169	226.107	FALSE	327.274	1.63752	1960.74	0.295739	5.94911	4.36214	0.847998	44.4675	0.100832
lachlanella	FALSE	119131	FALSE	387.486	198.901	15.9294	321.033	1.79154	1893.98	0.230006	6.5274	5.24018	0.8442	39.9082	0.101202
lachlanella	FALSE	119104	0.493627	422.557	172.343	FALSE	292.489	FALSE	1904.62	0.201748	6.02135	4.53059	0.855969	47.8887	0.0907389
lachlanella	FALSE	120651	FALSE	439.493	179.476	FALSE	257.503	1.33044	1941.29	0.305018	6.24115	4.65868	0.904327	51.2572	0.0890053
lachlanella	FALSE	120040	FALSE	479.694	148.332	25.8464	424.491	2.10997	1905.32	0.292468	5.883	4.62233	0.878359	82.7189	0.0944379
lachlanella	FALSE	119170	0.457334	460.6	192.976	71.3643	555.814	1.4835	1926.95	0.471295	5.86943	4.62517	0.864757	139.033	0.0863848
lachlanella	FALSE	116404	0.76432	480.142	151.001	58.8565	497.952	2.14407	1915.12	0.33179	5.99061	4.7873	0.879733	139.297	0.103366
lachlanella	#DIV/0!	120506	0.661717	484.584	219.043	34.5439	387.84	FALSE	1937.14	0.244772	6.59288	4.95113	0.942089	110.025	0.0926741
lachlanella	FALSE	118467	FALSE	508.136	FALSE	70.3448	660.404	1.50046	1977.88	0.551036	5.99525	4.69195	0.852186	217.274	0.0853376
lachlanella	FALSE	117631	1.05314	415.347	440.574	FALSE	413.669	FALSE	1909.29	0.413152	6.32504	4.73751	1.05999	41.8655	0.127506
lachlanella	FALSE	115831	FALSE	416.985	FALSE	32.5644	386.512	FALSE	1887.75	0.320286	7.26851	5.63024	1.07654	44.4828	0.115107
lachlanella	FALSE	119625	FALSE	428.987	FALSE	FALSE	363.948	FALSE	1825.85	0.289222	6.22264	4.68233	0.971735	53.2467	0.103944
lachlanella	FALSE	115112	FALSE	445.744	FALSE	35.0089	419.731	FALSE	1824.84	0.32718	5.85375	4.11319	0.792757	85.6871	0.0863046
lachlanella	FALSE	120243	FALSE	443.79	296.582	44.8942	567.463	FALSE	1851.93	0.292781	5.37665	4.55446	0.739003	122.162	0.114703
lachlanella	FALSE	118179	FALSE	502.675	206.873	42.5091	480.426	FALSE	1794.68	0.327234	6.99806	5.47804	1.11391	134.329	0.126678
lachlanella	#DIV/0!	120184	2.10495	389.224	846.307	36.2958	423.649	FALSE	1755.65	0.367019	5.99634	4.29018	0.795547	123.383	0.122843
lachlanella	#DIV/0!	119979	FALSE	476.653	206.527	72.5707	530.175	FALSE	1820.2	0.281148	5.73724	4.39466	0.726967	152.871	0.0878379
lachlanella	FALSE	115469	FALSE	463.901	266.441	103.963	578.025	FALSE	1792.92	0.381106	5.95567	4.44846	0.804695	191.774	0.0925003
lachlanella	FALSE	114678	FALSE	497.931	249.58	95.1425	502.819	FALSE	1776.54	0.335032	FALSE	4.94089	0.8719	176.446	0.0910236
