# Supplementary material for: Biogeochemical Dichotomy and Intra-Order Variability in Miliolid and Rotaliid Foraminifera
Source: Copernicus journal article supplement (doi:10.5194/egusphere-2026-38), 2026-02-03
Supplement: Supplementary file 3 [file S3a.xlsx]

## Sheet: S3a
Rotaliids vs Miliolids comparison - two-sided Mann–Whitney U tests
Metal	Sample size Rotaliids	Sample size Miliolids	statistic	p	p.adj	p.adj.signif
Li	40	5	200	1.64e-06	2.46e-06	****
Mg	52	100	630	2.03e-14	3.81e-14	****
V	20	33	241	0.105	0.105	ns
Mn	51	100	44	6.35e-23	3.17e-22	****
Fe	19	48	328	0.076	0.0877	ns
Cu	30	65	389	2.76e-06	3.76e-06	****
Zn	1	58	0	0.0942	0.101	ns
As	20	49	143	1.01e-06	1.68e-06	****
Sr	52	100	1879	0.00514	0.00642	**
Cd	43	98	68	6.93e-20	1.49e-19	****
La	52	99	0	6.91e-24	5.18e-23	****
Nd	52	100	0	5.78e-24	5.18e-23	****
Sm	39	100	2	6.85e-20	1.49e-19	****
Pb	52	100	155	2.23e-21	6.69e-21	****
U	48	100	0	8.47e-23	3.18e-22	****
