# Supplementary material for: Biogeochemical Dichotomy and Intra-Order Variability in Miliolid and Rotaliid Foraminifera
Source: Copernicus journal article supplement (doi:10.5194/egusphere-2026-38), 2026-02-03
Supplement: Supplementary file 4 [file S3b.xlsx]

## Sheet: S3b
Comparisons among multiple species - Kruskal-Wallis								Comparisons among multiple species - pairwise Wilcoxon
Metal	Sample size Rotaliids	Sample size Miliolids	statistic	p	p.adj	p.adj.signif		Metal	group1	group2	n1	n2	statistic	p	p.adj	p.adj.signif
Li	40	5	200	1.64e-06	2.46e-06	****		Li	A. lobifera	P. calcariformata	30	10	8	1.58e-07	4.74e-07	****
Mg	52	100	630	2.03e-14	3.81e-14	****		Li	A. lobifera	S. orbiculus	30	5	150	6.16e-06	9.24e-06	****
V	20	33	241	0.105	0.105	ns		Li	P. calcariformata	S. orbiculus	10	5	50	0.000666	0.000666	***
Mn	51	100	44	6.35e-23	3.17e-22	****		Mg	A. lobifera	P. calcariformata	38	10	0	3.06e-10	7.65e-10	****
Fe	19	48	328	0.076	0.0877	ns		Mg	A. lobifera	R. glabolaris	38	4	0	1.79e-05	2.98e-05	****
Cu	30	65	389	2.76e-06	3.76e-06	****		Mg	A. lobifera	S. orbiculus	38	40	0	7.54e-23	1.13e-21	****
Zn	1	58	0	0.0942	0.101	ns		Mg	A. lobifera	Peneroplis	38	30	0	1.12e-19	4.2e-19	****
As	20	49	143	1.01e-06	1.68e-06	****		Mg	A. lobifera	Lachlanella	38	30	0	1.12e-19	4.2e-19	****
Sr	52	100	1879	0.00514	0.00642	**		Mg	P. calcariformata	R. glabolaris	10	4	40	0.002	0.002	**
Cd	43	98	68	6.93e-20	1.49e-19	****		Mg	P. calcariformata	S. orbiculus	10	40	239	0.356	0.356	ns
La	52	99	0	6.91e-24	5.18e-23	****		Mg	P. calcariformata	Peneroplis	10	30	91	0.067	0.072	ns
Nd	52	100	0	5.78e-24	5.18e-23	****		Mg	P. calcariformata	Lachlanella	10	30	300	2.36e-09	5.06e-09	****
Sm	39	100	2	6.85e-20	1.49e-19	****		Mg	R. glabolaris	S. orbiculus	4	40	0	1.47e-05	2.76e-05	****
Pb	52	100	155	2.23e-21	6.69e-21	****		Mg	R. glabolaris	Peneroplis	4	30	0	4.31e-05	5.88e-05	****
U	48	100	0	8.47e-23	3.18e-22	****		Mg	R. glabolaris	Lachlanella	4	30	0	4.31e-05	5.88e-05	****
								Mg	S. orbiculus	Peneroplis	40	30	295	0.000212	0.000265	***
								Mg	S. orbiculus	Lachlanella	40	30	1200	3.61e-20	2.71e-19	****
								Mg	Peneroplis	Lachlanella	30	30	900	1.69e-17	5.07e-17	****
								V	A. lobifera	P. calcariformata	8	8	11	0.028	0.034	*
								V	A. lobifera	R. glabolaris	8	4	0	0.004	0.006	**
								V	A. lobifera	S. orbiculus	8	18	33	0.03	0.034	*
								V	A. lobifera	Lachlanella	8	15	0	4.08e-06	2.04e-05	****
								V	P. calcariformata	R. glabolaris	8	4	0	0.004	0.006	**
								V	P. calcariformata	S. orbiculus	8	18	73	0.978	0.978	ns
								V	P. calcariformata	Lachlanella	8	15	3	2.86e-05	9.53e-05	****
								V	R. glabolaris	S. orbiculus	4	18	72	0.000273	0.000682	***
								V	R. glabolaris	Lachlanella	4	15	60	0.000516	0.001	**
								V	S. orbiculus	Lachlanella	18	15	4	2.31e-08	2.31e-07	****
								Mn	A. lobifera	P. calcariformata	38	10	129	0.126	0.126	ns
								Mn	A. lobifera	R. glabolaris	38	3	0	0.000188	0.000256	***
								Mn	A. lobifera	S. orbiculus	38	40	0	7.54e-23	1.13e-21	****
								Mn	A. lobifera	Peneroplis	38	30	0	1.12e-19	4.2e-19	****
								Mn	A. lobifera	Lachlanella	38	30	0	1.12e-19	4.2e-19	****
								Mn	P. calcariformata	R. glabolaris	10	3	5	0.112	0.12	ns
								Mn	P. calcariformata	S. orbiculus	10	40	15	1.28e-07	2.4e-07	****
								Mn	P. calcariformata	Peneroplis	10	30	29	4e-05	6.67e-05	****
								Mn	P. calcariformata	Lachlanella	10	30	0	2.36e-09	5.06e-09	****
								Mn	R. glabolaris	S. orbiculus	3	40	0	0.000162	0.000243	***
								Mn	R. glabolaris	Peneroplis	3	30	0	0.000367	0.000423	***
								Mn	R. glabolaris	Lachlanella	3	30	0	0.000367	0.000423	***
								Mn	S. orbiculus	Peneroplis	40	30	1137	3.73e-13	9.32e-13	****
								Mn	S. orbiculus	Lachlanella	40	30	0	3.61e-20	2.71e-19	****
								Mn	Peneroplis	Lachlanella	30	30	0	1.69e-17	5.07e-17	****
								Fe	A. lobifera	P. calcariformata	6	9	0	0.0004	0.000774	***
								Fe	A. lobifera	R. glabolaris	6	4	0	0.01	0.012	*
								Fe	A. lobifera	S. orbiculus	6	16	0	2.68e-05	0.000134	***
								Fe	A. lobifera	Peneroplis	6	6	0	0.002	0.004	**
								Fe	A. lobifera	Lachlanella	6	26	0	2.21e-06	1.66e-05	****
								Fe	P. calcariformata	R. glabolaris	9	4	0	0.003	0.004	**
								Fe	P. calcariformata	S. orbiculus	9	16	91	0.301	0.322	ns
								Fe	P. calcariformata	Peneroplis	9	6	18	0.328	0.328	ns
								Fe	P. calcariformata	Lachlanella	9	26	27	0.000291	0.000728	***
								Fe	R. glabolaris	S. orbiculus	4	16	64	0.000413	0.000774	***
								Fe	R. glabolaris	Peneroplis	4	6	24	0.01	0.012	*
								Fe	R. glabolaris	Lachlanella	4	26	104	7.3e-05	0.000219	***
								Fe	S. orbiculus	Peneroplis	16	6	18	0.027	0.031	*
								Fe	S. orbiculus	Lachlanella	16	26	6	3.6e-10	5.4e-09	****
								Fe	Peneroplis	Lachlanella	6	26	6	6.62e-05	0.000219	***
								Cu	A. lobifera	P. calcariformata	20	10	61	0.091	0.129	ns
								Cu	A. lobifera	S. orbiculus	20	23	99	0.001	0.002	**
								Cu	A. lobifera	Peneroplis	20	20	80	0.000836	0.002	**
								Cu	A. lobifera	Lachlanella	20	22	20	1.06e-08	1.06e-07	****
								Cu	P. calcariformata	S. orbiculus	10	23	75	0.123	0.154	ns
								Cu	P. calcariformata	Peneroplis	10	20	90	0.681	0.681	ns
								Cu	P. calcariformata	Lachlanella	10	22	25	0.000233	0.000777	***
								Cu	S. orbiculus	Peneroplis	23	20	284	0.195	0.217	ns
								Cu	S. orbiculus	Lachlanella	23	22	143	0.012	0.02	*
								Cu	Peneroplis	Lachlanella	20	22	55	9.48e-06	4.74e-05	****
								Zn	S. orbiculus	Peneroplis	16	12	31	0.002	0.002	**
								Zn	S. orbiculus	Lachlanella	16	30	1	4.03e-12	1.21e-11	****
								Zn	Peneroplis	Lachlanella	12	30	35	1.13e-05	1.7e-05	****
								As	A. lobifera	P. calcariformata	10	10	6	0.000325	0.000806	***
								As	A. lobifera	S. orbiculus	10	21	6	1.35e-06	5.83e-06	****
								As	A. lobifera	Peneroplis	10	13	0	1.75e-06	5.83e-06	****
								As	A. lobifera	Lachlanella	10	15	0	6.12e-07	5.83e-06	****
								As	P. calcariformata	S. orbiculus	10	21	78	0.268	0.298	ns
								As	P. calcariformata	Peneroplis	10	13	44	0.208	0.26	ns
								As	P. calcariformata	Lachlanella	10	15	15	0.000403	0.000806	***
								As	S. orbiculus	Peneroplis	21	13	140	0.917	0.917	ns
								As	S. orbiculus	Lachlanella	21	15	63	0.002	0.003	**
								As	Peneroplis	Lachlanella	13	15	27	0.000687	0.001	**
								Sr	A. lobifera	P. calcariformata	38	10	0	3.06e-10	2.3e-09	****
								Sr	A. lobifera	R. glabolaris	38	4	0	1.79e-05	2.98e-05	****
								Sr	A. lobifera	S. orbiculus	38	40	256	1.13e-07	2.42e-07	****
								Sr	A. lobifera	Peneroplis	38	30	213	4.21e-06	7.89e-06	****
								Sr	A. lobifera	Lachlanella	38	30	35	9.08e-15	1.36e-13	****
								Sr	P. calcariformata	R. glabolaris	10	4	29	0.24	0.257	ns
								Sr	P. calcariformata	S. orbiculus	10	40	390	2.71e-08	6.78e-08	****
								Sr	P. calcariformata	Peneroplis	10	30	300	2.36e-09	8.85e-09	****
								Sr	P. calcariformata	Lachlanella	10	30	300	2.36e-09	8.85e-09	****
								Sr	R. glabolaris	S. orbiculus	4	40	149	0.002	0.002	**
								Sr	R. glabolaris	Peneroplis	4	30	118	0.000173	0.000236	***
								Sr	R. glabolaris	Lachlanella	4	30	118	0.000173	0.000236	***
								Sr	S. orbiculus	Peneroplis	40	30	665	0.446	0.446	ns
								Sr	S. orbiculus	Lachlanella	40	30	333	0.001	0.002	**
								Sr	Peneroplis	Lachlanella	30	30	94	1.08e-08	3.24e-08	****
								Cd	A. lobifera	P. calcariformata	32	10	32	4.05e-05	4.5e-05	****
								Cd	A. lobifera	S. orbiculus	32	38	0	2.3e-20	2.3e-19	****
								Cd	A. lobifera	Peneroplis	32	30	0	4.44e-18	1.48e-17	****
								Cd	A. lobifera	Lachlanella	32	30	0	4.44e-18	1.48e-17	****
								Cd	P. calcariformata	S. orbiculus	10	38	1	6.12e-10	1.22e-09	****
								Cd	P. calcariformata	Peneroplis	10	30	0	2.36e-09	3.37e-09	****
								Cd	P. calcariformata	Lachlanella	10	30	0	2.36e-09	3.37e-09	****
								Cd	S. orbiculus	Peneroplis	38	30	694	0.128	0.128	ns
								Cd	S. orbiculus	Lachlanella	38	30	132	5.02e-09	6.28e-09	****
								Cd	Peneroplis	Lachlanella	30	30	24	1.24e-13	3.1e-13	****
								La	A. lobifera	P. calcariformata	38	10	0	3.06e-10	9.18e-10	****
								La	A. lobifera	R. glabolaris	38	4	0	1.79e-05	2.68e-05	****
								La	A. lobifera	S. orbiculus	38	40	0	7.54e-23	1.13e-21	****
								La	A. lobifera	Peneroplis	38	30	0	1.12e-19	8.4e-19	****
								La	A. lobifera	Lachlanella	38	29	0	2.54e-19	1.27e-18	****
								La	P. calcariformata	R. glabolaris	10	4	0	0.002	0.002	**
								La	P. calcariformata	S. orbiculus	10	40	0	1.95e-10	7.31e-10	****
								La	P. calcariformata	Peneroplis	10	30	0	2.36e-09	5.9e-09	****
								La	P. calcariformata	Lachlanella	10	29	0	3.15e-09	6.75e-09	****
								La	R. glabolaris	S. orbiculus	4	40	0	1.47e-05	2.45e-05	****
								La	R. glabolaris	Peneroplis	4	30	0	4.31e-05	5.88e-05	****
								La	R. glabolaris	Lachlanella	4	29	0	4.89e-05	6.11e-05	****
								La	S. orbiculus	Peneroplis	40	30	282	0.000107	0.000123	***
								La	S. orbiculus	Lachlanella	40	29	228	8.61e-06	1.61e-05	****
								La	Peneroplis	Lachlanella	30	29	425	0.886	0.886	ns
								Nd	A. lobifera	P. calcariformata	38	10	0	3.06e-10	9.18e-10	****
								Nd	A. lobifera	R. glabolaris	38	4	0	1.79e-05	2.68e-05	****
								Nd	A. lobifera	S. orbiculus	38	40	0	7.54e-23	1.13e-21	****
								Nd	A. lobifera	Peneroplis	38	30	0	1.12e-19	5.6e-19	****
								Nd	A. lobifera	Lachlanella	38	30	0	1.12e-19	5.6e-19	****
								Nd	P. calcariformata	R. glabolaris	10	4	0	0.002	0.002	**
								Nd	P. calcariformata	S. orbiculus	10	40	0	1.95e-10	7.31e-10	****
								Nd	P. calcariformata	Peneroplis	10	30	0	2.36e-09	5.06e-09	****
								Nd	P. calcariformata	Lachlanella	10	30	0	2.36e-09	5.06e-09	****
								Nd	R. glabolaris	S. orbiculus	4	40	0	1.47e-05	2.45e-05	****
								Nd	R. glabolaris	Peneroplis	4	30	0	4.31e-05	5.39e-05	****
								Nd	R. glabolaris	Lachlanella	4	30	0	4.31e-05	5.39e-05	****
								Nd	S. orbiculus	Peneroplis	40	30	309	0.000426	0.000492	***
								Nd	S. orbiculus	Lachlanella	40	30	710	0.195	0.195	ns
								Nd	Peneroplis	Lachlanella	30	30	758	1.57e-06	2.94e-06	****
								Sm	A. lobifera	P. calcariformata	26	10	0	7.87e-09	1.48e-08	****
								Sm	A. lobifera	R. glabolaris	26	3	0	0.000547	0.000684	***
								Sm	A. lobifera	S. orbiculus	26	40	0	1.21e-18	1.82e-17	****
								Sm	A. lobifera	Peneroplis	26	30	0	3.01e-16	1.5e-15	****
								Sm	A. lobifera	Lachlanella	26	30	0	3.01e-16	1.5e-15	****
								Sm	P. calcariformata	R. glabolaris	10	3	7	0.217	0.232	ns
								Sm	P. calcariformata	S. orbiculus	10	40	0	1.95e-10	7.31e-10	****
								Sm	P. calcariformata	Peneroplis	10	30	0	2.36e-09	5.06e-09	****
								Sm	P. calcariformata	Lachlanella	10	30	0	2.36e-09	5.06e-09	****
								Sm	R. glabolaris	S. orbiculus	3	40	2	0.000648	0.000748	***
								Sm	R. glabolaris	Peneroplis	3	30	0	0.000367	0.0005	***
								Sm	R. glabolaris	Lachlanella	3	30	0	0.000367	0.0005	***
								Sm	S. orbiculus	Peneroplis	40	30	182	1.45e-07	2.42e-07	****
								Sm	S. orbiculus	Lachlanella	40	30	619	0.827	0.827	ns
								Sm	Peneroplis	Lachlanella	30	30	824	1.09e-09	3.27e-09	****
								Pb	A. lobifera	P. calcariformata	38	10	18	4.52e-07	9.69e-07	****
								Pb	A. lobifera	R. glabolaris	38	4	0	1.79e-05	2.98e-05	****
								Pb	A. lobifera	S. orbiculus	38	40	0	7.54e-23	1.13e-21	****
								Pb	A. lobifera	Peneroplis	38	30	0	1.12e-19	5.6e-19	****
								Pb	A. lobifera	Lachlanella	38	30	0	1.12e-19	5.6e-19	****
								Pb	P. calcariformata	R. glabolaris	10	4	0	0.002	0.002	**
								Pb	P. calcariformata	S. orbiculus	10	40	0	1.95e-10	5.85e-10	****
								Pb	P. calcariformata	Peneroplis	10	30	12	6.35e-07	1.19e-06	****
								Pb	P. calcariformata	Lachlanella	10	30	0	2.36e-09	5.9e-09	****
								Pb	R. glabolaris	S. orbiculus	4	40	54	0.311	0.311	ns
								Pb	R. glabolaris	Peneroplis	4	30	89	0.131	0.14	ns
								Pb	R. glabolaris	Lachlanella	4	30	0	4.31e-05	6.46e-05	****
								Pb	S. orbiculus	Peneroplis	40	30	913	0.00014	0.000175	***
								Pb	S. orbiculus	Lachlanella	40	30	282	0.000107	0.000146	***
								Pb	Peneroplis	Lachlanella	30	30	4	2.03e-16	7.61e-16	****
								U	A. lobifera	P. calcariformata	38	10	0	3.06e-10	4.37e-10	****
								U	A. lobifera	S. orbiculus	38	40	0	7.54e-23	7.54e-22	****
								U	A. lobifera	Peneroplis	38	30	0	1.12e-19	3.73e-19	****
								U	A. lobifera	Lachlanella	38	30	0	1.12e-19	3.73e-19	****
								U	P. calcariformata	S. orbiculus	10	40	0	1.95e-10	3.25e-10	****
								U	P. calcariformata	Peneroplis	10	30	0	2.36e-09	2.62e-09	****
								U	P. calcariformata	Lachlanella	10	30	0	2.36e-09	2.62e-09	****
								U	S. orbiculus	Peneroplis	40	30	1034	3.86e-08	3.86e-08	****
								U	S. orbiculus	Lachlanella	40	30	1163	4.36e-15	1.09e-14	****
								U	Peneroplis	Lachlanella	30	30	846	4.2e-11	8.4e-11	****
