# Supplementary material for: Biogeochemical Dichotomy and Intra-Order Variability in Miliolid and Rotaliid Foraminifera
Source: Copernicus journal article supplement (doi:10.5194/egusphere-2026-38), 2026-02-03
Supplement: Supplementary file 5 [file S4.xlsx]

## Sheet: S4
Metal	Sample size Rotaliids	Sample size Miliolids	Median Rotaliids	Median Miliolids	Fold higher	Higher group
La	52	99	0.135	5.99	44.5	Miliolids
Nd	52	100	0.13	5.23	40.2	Miliolids
Sm	39	100	0.0286	0.94	32.8	Miliolids
Mn	51	100	15.2	242	15.9	Miliolids
Pb	52	100	3.71	40	10.8	Miliolids
U	48	100	0.0138	0.147	10.6	Miliolids
Zn	1	58	30	293	9.76	Miliolids
Cd	43	98	0.0426	0.207	4.86	Miliolids
Mg	52	100	42.4	143	3.38	Miliolids
Li	40	5	21.5	6.89	3.12	Rotaliids
Cu	30	65	15.2	27.4	1.81	Miliolids
As	20	49	0.877	1.56	1.78	Miliolids
Fe	19	48	104	181	1.74	Miliolids
V	20	33	0.31	0.459	1.48	Miliolids
Sr	52	100	1.71	1.8	1.05	Miliolids
